# Supplementary material
Source: Research Square preprint supplement (doi:10.21203/rs.3.rs-9086210/v1)
Supplement: Supplementary file 1 [file 2903ccba005e979d2f67b3b5.docx]

Supplementary Material.

**Experimental procedures**

*Weaning*

At weaning (P21), animals were housed in same-sex sibling pairs (one pair per cage). From this point onward, cages were enriched with basic supplements such as plastic tunnels to promote environmental stimulation.

*Immunostainings and microscopy*

Rats were anaesthetized with an overdose of pentobarbital (60 mg/ml), 90 min after the EC test, and then transcardially perfused with phosphate-buffered saline solution (PBS) followed by ice-cold 4% paraformaldehyde (PFA) in PBS. Dissected brains were stored in 30% sucrose in PBS for cryoprotection before storage at -80°C. Coronal brain sections (40 μm thick) were cut using a CM3050 S cryostat (Leica Biosystems, USA), and every 6th section was collected in PBS. To assess neuronal activation in the area 24, immunofluorescent labeling was done for c-Fos, an immediate early gene, commonly used as marker of general neuronal activity. Briefly, to block the background and open the tissue matrix, free-floating sections were first incubated in 3% bovine serum albumin (BSA) and 0.3% Triton X-100 (Sigma, Cas. no.: 9036-19-5) in PBS at room temperature for 2 hrs, and then incubated with rabbit anti-c-Fos antibody (1:1000 dilution; Synaptic Systems: 226 003; RRID: AB_2231974) at 4 °C overnight. After washing three times with PBS, sections were incubated with Alexa Fluor 594 donkey anti-rabbit secondary antibody (1:800 dilution; Invitrogen: A21207; RRID: AB_141637) at room temperature for 2 hrs. Following three washes with PBS, sections were mounted with a mounting medium including DAPI (Vectashield Vibrance; Vector Laboratories: H-1800) onto glass microscopic slides and covered with glass cover slips. All images were acquired with a Zeiss Axio Scan Z1 fluorescent slide scanning microscope (software: Zeiss Zen 3.7; Carl Zeiss AG, Germany) at 10x magnification (Plan-Apochromat 10x/0.45 M27) and a resolution of 0.65 µm/pixel with a digital CMOS camera (ORCA-Flash4 V3; Hamamatsu Photonics K.K., Japan).

**Analysis**

*Maternal behaviors*

Scoring focused on two main behavioral categories: pup-directed behaviors, including licking and grooming, pup carrying, arched-back nursing, low nursing, and passive/side nursing, and non-pup-directed behaviors, such as self-grooming, time spent off-nest, rearing, and eating/drinking. The video-recordings were acquired at 10h00, during the dark phase of the light/dark cycle.

*Entropy*

The entropy index quantifies how unpredictable the transition from one behaviour to the next behaviour is for each dam. The entropy index for any one dam ranges from 0, where behaviour is completely predictable, with any given behavior i always followed by a particular behavior j (i.e. pij=1), whilst all other transitions have probability zero, to the logarithm in base 2 of the number of behaviours analysed here (nest building, tail chasing, licking/grooming, arched-back nursing, side/passive nursing, low nursing, carrying pups, selfgrooming, off-nest, move around nest, eat/drink, rearing), log2(12)=3.58, where all transitions are equiprobable and the dam’s behavioural transitions are maximally entropic, or unpredictable. Furthermore, an additional level of complexity is added to the entropy calculation by using the empirical transition matrix; as described by Demaestri et al. (2022) and Molet et al. (2016): entropy is calculated for each row, each of which represents a probability distribution, and then combined into a singular measure. The stationary distribution πi of the Markov chain (a measure of long-term probability of each behaviour) is calculated and used to weight the entropy values. The entropy index is calculated with the equation below, where *i* represents the initial behaviour, *j* represents the following behaviour, and P*ij* represents the probability of the transition from the initial behaviour (*i*) to the following behaviour (*j*). Given that LBN was imposed from P2 to P9, to assess whether LBN altered entropy, we directly compared entropy from P3 to P7 (sampled at P3, P5 and P6-7).


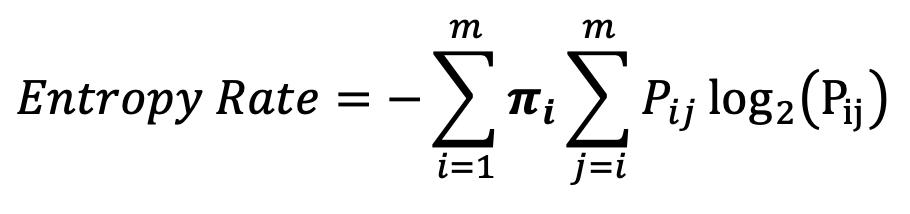


*Vocalizations*

The “Long Rat call v2” network was applied for detection of 22-kHz vocalizations using a frequency range of 18–100 kHz. 50-kHz vocalizations were detected using a high-frequency cutoff of 100 kHz and a low-frequency cutoff of 30 kHz, using the “All short calls v1” network. False positives were manually rejected. Squeaks were identified through visual inspection of the spectrogram. The frequency of 50-kHz vocalizations was extracted from the spectral band corresponding to the peak intensity of each vocalization and quantified as the mode of its distribution, given its skewed nature (Supplementary figure 1B and C).

*Pose estimation*

The following body parts were labeled: “Nose", "Right_before_eye", "Right_before_ear", "Right_after_ear", "Left_before_eye", "Left_before_ear", "Left_after_ear", "Skeleton_1", "Skeleton_2", "Skeleton_3", "Tail", "Right_side_3", "Right_side_tail", "Left_side_3", and "Left_side_tail”. Labels with a DeepLabCut likelihood score below 0.6 were discarded. Box coordinates (i.e., platform corners) were manually extracted in Fiji from each video. These coordinates, along with body part labels, were then converted and merged into a common spatial coordinate plane to reconstruct the original setup as if videos had not been cropped. For each frame, we computed average positions for the head, body, and tail of each animal. Metrics were then calculated frame-by-frame, including (1) the distance of the observer’s head to the separator between the observer and the demonstrator, and (2) the angle between the observer’s and demonstrator’s head directions. To minimize overestimation caused by rearing behaviors (where body parts extend beyond the platform), we projected all body parts within the horizontal plane of the platform before computing distances. Finally, all distance-based measures were normalized to the diagonal length of the platform box, constraining values to approximately the [0,1] interval.

*Cell counting*

At first, random sections from random animals were selected to find the optimal quantification parameters (e.g., threshold, cell size), then all sections were analyzed using the same parameters. Results were checked by a researcher to avoid misquantification. Samples with poor tissue or staining quality, extensive damage, or imaging issues were excluded from the analysis. c-Fos counts were summed up per region per animal and normalized to the total analyzed area (mm2).

**Statistical analysis**

The number of animals, the Bayes factor, and the test used for each analysis are specified in the Results section. For datasets with *n* ≥ 6 normality was assessed using the Shapiro-Wilk test. If the data were normally distributed, independent samples *t*-tests were used for two-group comparisons. For non-normally distributed data or small sample sizes (*n* < 6), the non-parametric Mann–Whitney U test was used for group comparisons. Data involving more than two groups were analyzed using two- or three-way ANOVAs, following an inspection of Q–Q plots to assess normality and homogeneity of variances. The mediation analysis was implemented in JASP (method: robust) in order to estimate whether vocalization characteristics (ratio between the average rate during baseline and shock periods of 50 kHz and 22k-Hz rates) or observer immobility (expressed in percentage) could mediate the effect of LBN on the Demonstrator immobility during shock experience.

**Supplementary Figure 1. Female 50-kHz vocalizations during EC were affected by EAE, not LAE.**

A. Average rate of 22-kHz vocalizations during baseline and shock periods in control and LBN females. Control and LBN sham n = 10, adult n = 10, adolescent n = 8.

B. Histograms of 50-kHz vocalization frequencies during EC baseline and shock periods in the control condition for sham, adult, and adolescence LAE groups.

C. Histograms of 50-kHz vocalization frequencies during EC baseline and shock periods in the LBN condition for sham, adult, and adolescence LAE groups.

D. Average rate of 50-kHz female vocalizations during EC baseline and shock periods in the control (left) and the LBN (right) condition. *p = 0.038.

E. 50-kHz vocalizations ratio between the average rate during EC baseline and shock periods in control and LBN conditions. *p = 0.015.

F. Average frequency of 50-kHz female vocalizations during EC baseline and shock periods in the control (left) and the LBN (right) condition. *p = 0.013.

G. 50-kHz vocalizations ratio between the average frequency during EC baseline and shock periods in control and LBN conditions. **p = 0.002.

**Supplementary Figure 2. Squeaks and 22-kHz vocalizations during footshocks were not affected by either EAE or LAE.**

A. Number of squeaks in 20 minutes during the total shock period in control (adult n = 8, adolescent n = 8) and LBN (adult n = 8, adolescent n = 8) conditions for females (left) and males (right): control (adult n = 10, adolescent n = 10) and LBN (adult n = 8, adolescent n = 8)

B. Average duration of squeaks during the total shock period in control and LBN conditions for females (left) and males (right).

C. Average duration of 22-kHz vocalizations during the total shock period in control and LBN conditions for females (left) and males (right).

**Supplementary Method Figure 1. Timeline of handling and habituation for EC**

Day 1-5 Handling: Observers and demonstrators were handled for 5 minutes per day. Day 6 Habituation 1: First habituation session to the EC apparatus (10 min). Day 7 LAE manipulation. Day 8-9 Habituation 2 and 3: Second and third habituation sessions (10 min each). Day 10 EC test.
